# Supplementary material for: Manipulation of the tumor microenvironment by cytokine gene transfection enhances dendritic cell‐based immunotherapy
Source: PubMed Central journal article supplement (PMC6996313; doi:10.1096/fba.2019-00052), 2019-11-26

### MDSCs

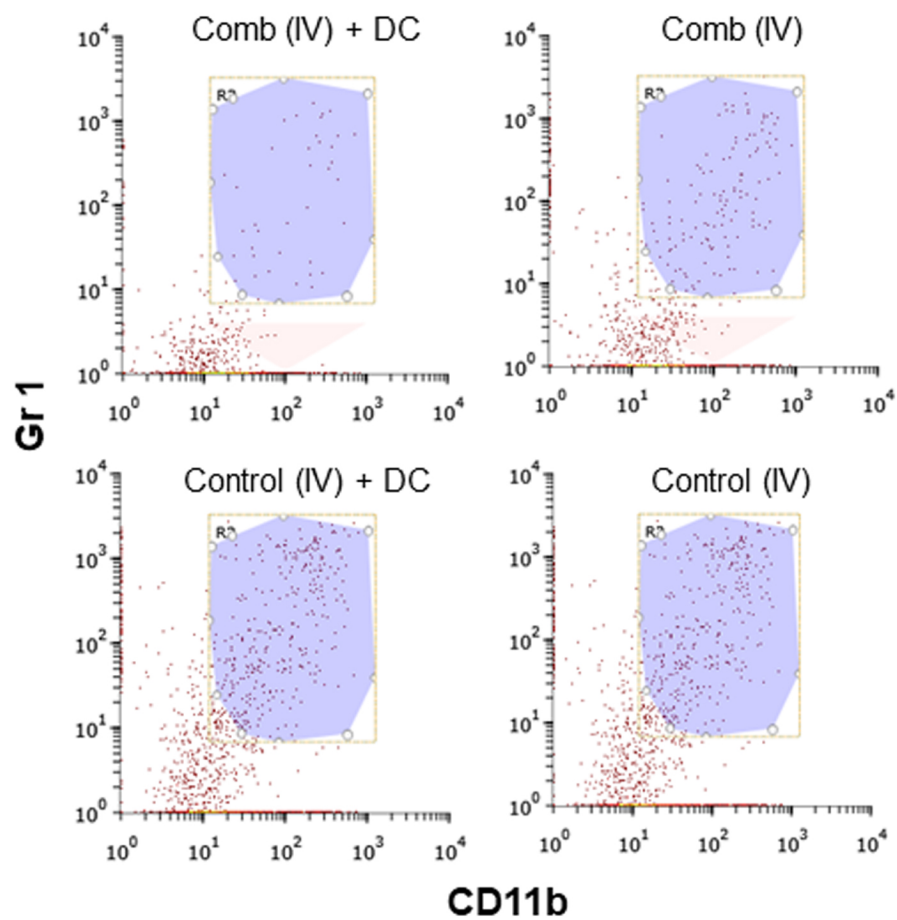

Supplement: FBA2-2-5-s006.pdf [file FBA2-2-5-s006.pdf]
