# Supplementary material for: Manipulation of the tumor microenvironment by cytokine gene transfection enhances dendritic cell‐based immunotherapy
Source: PubMed Central journal article supplement (PMC6996313; doi:10.1096/fba.2019-00052), 2019-11-26

**PD-L1<sup>+</sup> cells**

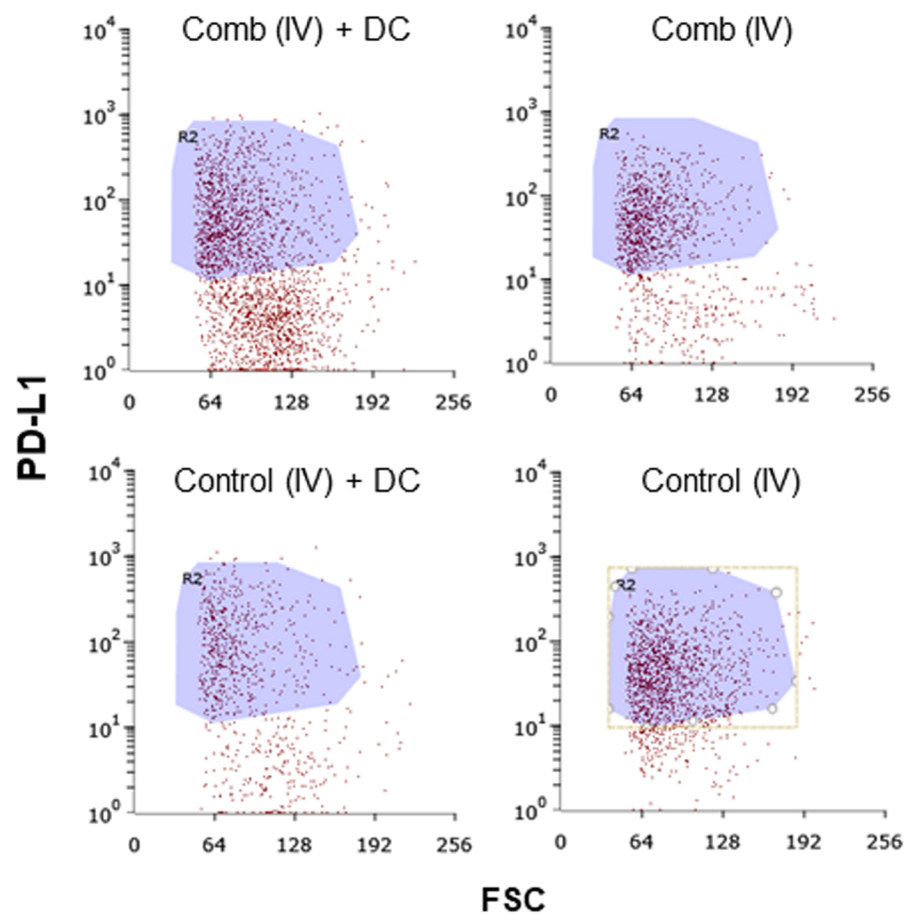

Supplement: FBA2-2-5-s007.pdf [file FBA2-2-5-s007.pdf]
