# Supplementary material for: Manipulation of the tumor microenvironment by cytokine gene transfection enhances dendritic cell‐based immunotherapy
Source: PubMed Central journal article supplement (PMC6996313; doi:10.1096/fba.2019-00052), 2019-11-26

**Iba-1<sup>+</sup> cells**

Comb (IV) + DC

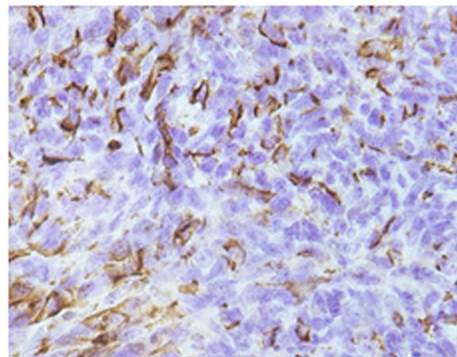

Comb (IV)

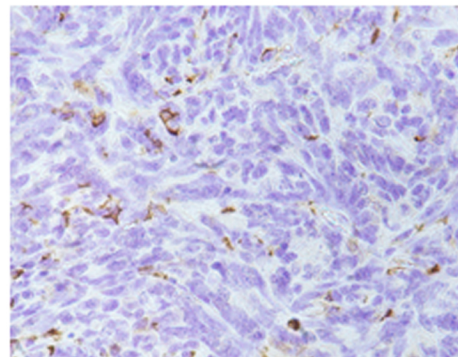

Control (IV) + DC

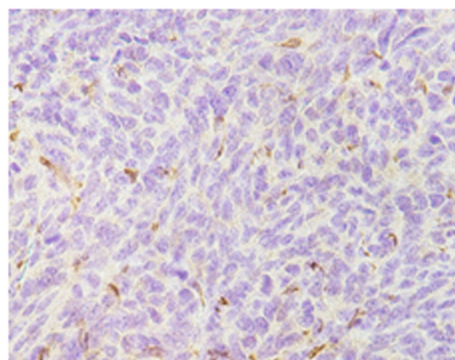

Control (IV)

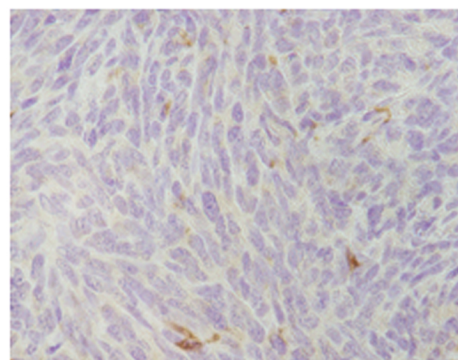

Supplement: FBA2-2-5-s008.pdf [file FBA2-2-5-s008.pdf]
